# Supplementary figures and images for: Diastereotopic group selective intramolecular cycloadditions of sulfenic acids to 1,4-dienesElectronic supplementary information (ESI) available: Ball and stick representations of the X-ray crystal structures of 12a and 13a. See http://www.rsc.org/suppdata/ob/b3/b314176d/
Source: Royal Society of Chemistry journal article supplement (doi:10.1039/b314176d), 2004-01-01

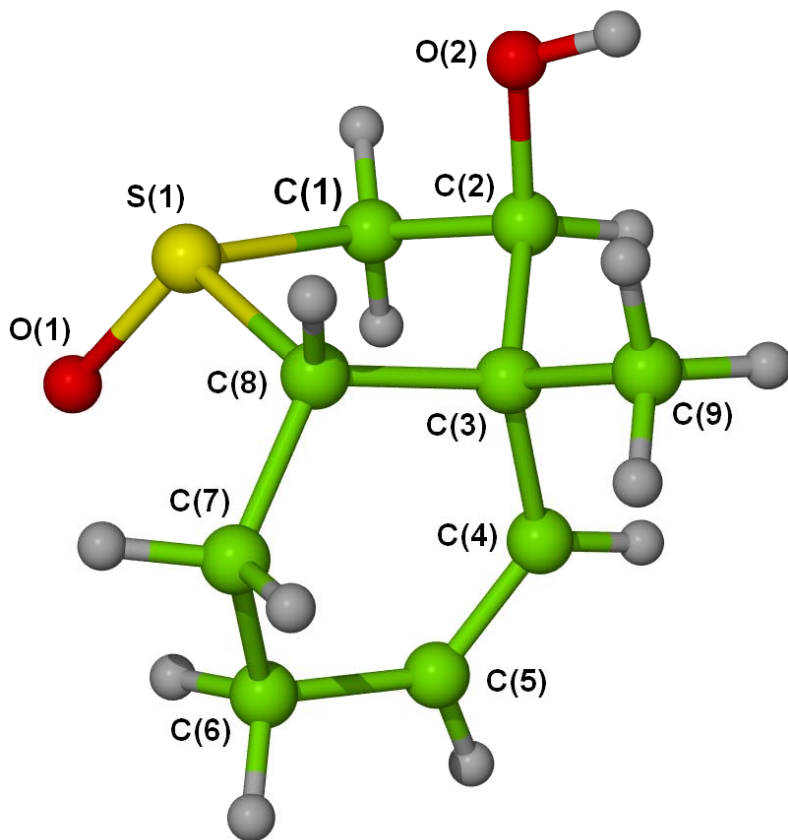

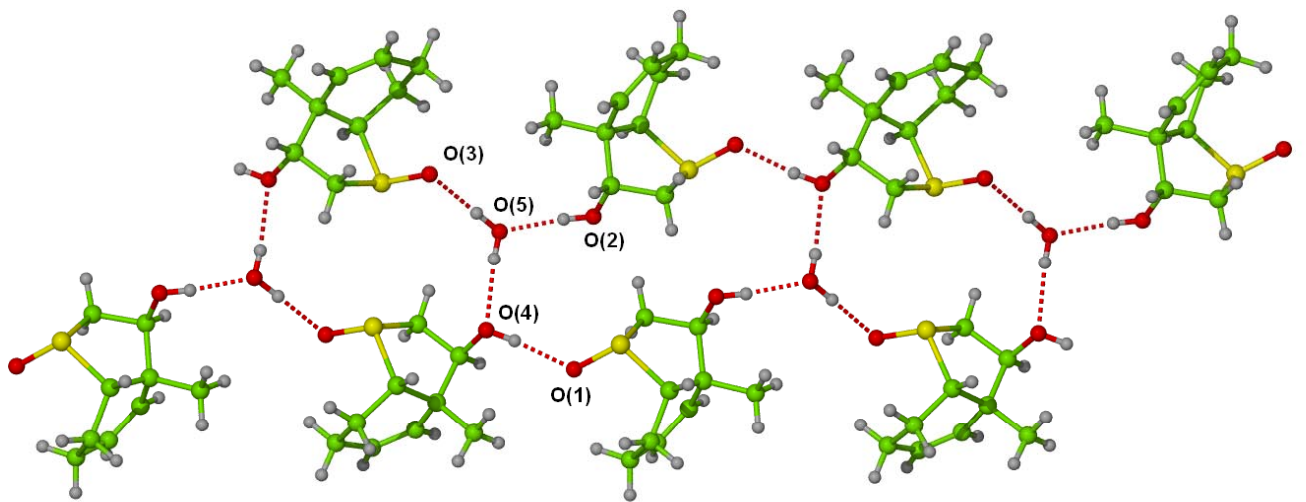

Supplement: b314176da.pdf [file b314176da.pdf]

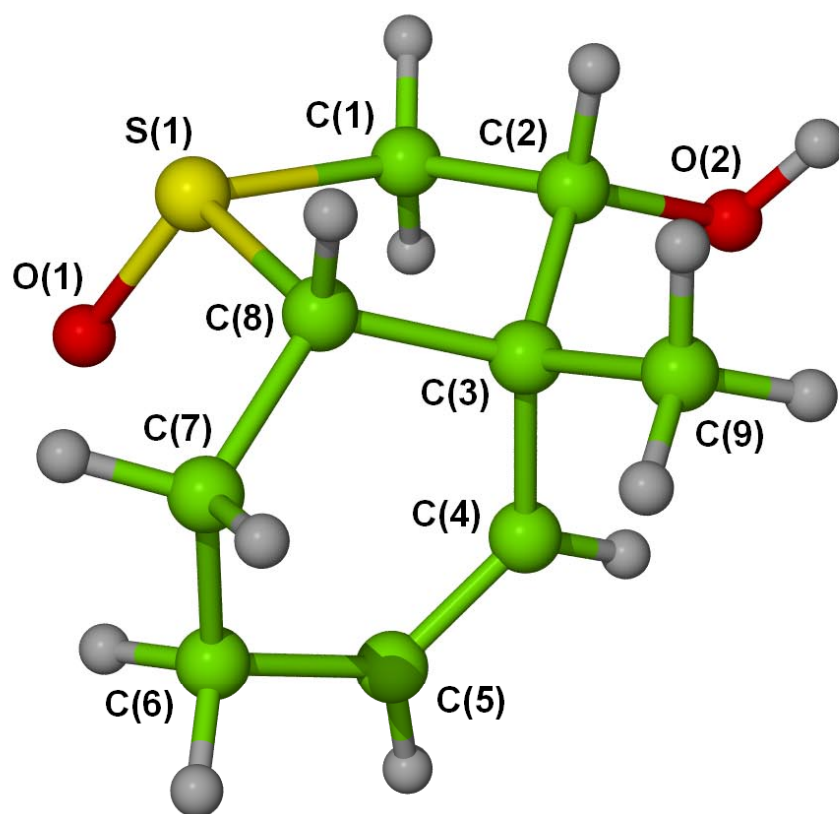

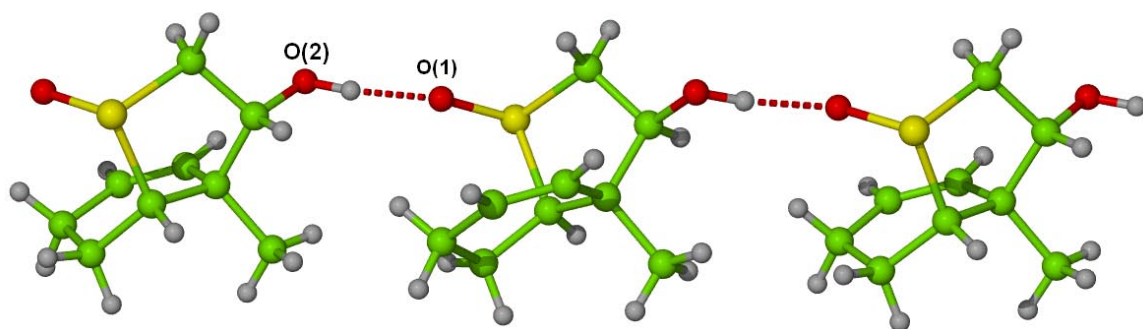

Supplement: b314176db.pdf [file b314176db.pdf]
